# Supplementary material for: Genetic associations of perinatal pain and depression
Source: PubMed Central journal article supplement — Mol Pain. 2019 Oct 15;15:1744806919882139. doi: 10.1177/1744806919882139 (PMC6796201; doi:10.1177/1744806919882139), 2019-10-15
Supplement: MPX882139_Supplemental_Material1.pdf [file MPX882139_Supplemental_Material1.pdf]

| chr | base position (GRCh37/hg 19) | SNP ID     | Locus #                 | Variant          | Opa        | Forward Primer Sequence | Reverse Primer Sequence                    | Extended Primer Sequence                    | Publication (PMID, unless otherwise stated) |                                                                                                                                                                       |
|-----|------------------------------|------------|-------------------------|------------------|------------|-------------------------|--------------------------------------------|---------------------------------------------|---------------------------------------------|-----------------------------------------------------------------------------------------------------------------------------------------------------------------------|
| 1   | 72811654                     | rs11209948 | NEGR1---[]---           | -                | Intergenic | opa1                    | ACGTTGGAT<br>GGACTTAATC<br>TCTTGAACCA<br>C | ACGTTGGAT<br>GTGGCACAT<br>TGAATCCCCT<br>TA  | cccTTCTGCA<br>ACTAGCCAA                     | 27479909                                                                                                                                                              |
| 1   | 72825394                     | rs6699744  | NEGR1---[]---           | -                | Intergenic | opa1                    | ACGTTGGAT<br>GGCATTCAA<br>CATGAGAGT<br>CC  | ACGTTGGAT<br>GAGGGGAAT<br>GAAATCTCT<br>AC   | ctccTTCAACA<br>TGAGAGTCC<br>TTAAATAT        | 29662059                                                                                                                                                              |
| 2   | 57987593                     | rs11682175 | ---[]---VRK2            |                  | intergenic | opa1                    | ACGTTGGAT<br>GATCTGCTTC<br>TGAAGGCAT<br>GG | ACGTTGGAT<br>GCAAGAAGA<br>AAATAACCT<br>GCCC | ctccAATAACC<br>TGCCCTAAA<br>GTAAAT          | 29700475                                                                                                                                                              |
| 2   | 167099408                    | rs6746030  | [SCN9A]                 | W>R<br>(Tgg>Cgg) |            | opa1                    | ACGTTGGAT<br>GGGTTTTCT<br>GATGTTCCAC<br>C  | ACGTTGGAT<br>GTGCATGTCT<br>TTCTTGTCAG<br>G  | TTCTTGTCAG<br>GTTGTGTA                      | 20212137                                                                                                                                                              |
| 3   | 8802478                      | rs2254298  | [OXTR]                  |                  | intronic   | opa1                    | ACGTTGGAT<br>GATTCAGAG<br>GAAGAAGCC<br>CCG | ACGTTGGAT<br>GGCCTGAAC<br>AGCTGAACA<br>TGG  | GAAACCATC<br>CCTGTTTTTC                     | ISBN: 978-0-12-397267-5<br>Neural<br>Circuit<br>Development<br>and Function<br>in the Brain;<br>Chapter 34 –<br>Autisms by<br>A.M. Persico;<br>2013, Pages<br>651–694 |
| 4   | 69961589                     | rs7438135  | UGT2B10---<br>[]-UGT2B7 |                  | intergenic | opa1                    | ACGTTGGAT<br>GACAGCCAA<br>ATAACTGTG<br>AGG | ACGTTGGAT<br>GCCAAGCTT<br>GTAGTACATT<br>CAG | acTCATTAGG<br>TTAGCTTGTT<br>CTC             | 29205277                                                                                                                                                              |

|   |           |            |                          |                                   |      |                                            |                                            |                                    |                             |
|---|-----------|------------|--------------------------|-----------------------------------|------|--------------------------------------------|--------------------------------------------|------------------------------------|-----------------------------|
| 5 | 10169573  | rs13361160 | ----[ ]---<br>FAM173B    | intergenic                        | opa1 | ACGTTGGAT<br>GTCACAGAC<br>GCTCAGAGC<br>CTT | ACGTTGGAT<br>GAGTGATGG<br>CCCTCTTTAC<br>AG | gggatGCCAG<br>GAGAGGGGC<br>CA      | 22956598                    |
| 5 | 88003153  | rs454214   | LINC00461--<br>[ ]-MEF2C | Intergenic                        | opa1 | ACGTTGGAT<br>GGCCTCCTA<br>GTAGATACT<br>ATC | ACGTTGGAT<br>GTGGAATTCT<br>ATTCACAGA<br>GG | CATCAGTGA<br>GCTAGGC               | 27479909                    |
| 5 | 148206723 | rs1042714  | [ADRB2]                  | Q>E<br>(Caa>Gaa)                  | opa1 | ACGTTGGAT<br>GCCTTCTTGC<br>TGGCACCCA<br>AT | ACGTTGGAT<br>GAGACATGA<br>CGATGCCCAT<br>GC | ctACACCTCG<br>TCCCTTT              | 16571957;<br>21600547       |
| 5 | 166992078 | rs4869056  | [TENM2]                  | intronic                          | opa1 | ACGTTGGAT<br>GAAACAATT<br>GAGAGGCGC<br>TAC | ACGTTGGAT<br>GTGTTAGCA<br>CTCTGTTGCA<br>GT | aagcgACAAA<br>ATCCAGAAA<br>AGAAATG | 29700475                    |
| 6 | 154331055 | rs1294094  | [ ]-OPRM1                | intergenic                        | opa1 | ACGTTGGAT<br>GTTCTCCAC<br>ATGTGAGAG<br>AC  | ACGTTGGAT<br>GTCCCATTCC<br>CTCATCTAAG<br>C | agCTAAGCTT<br>ATTTATCTGT<br>CCTTTG |                             |
| 6 | 154331434 | rs1319339  | [ ]-OPRM1                | intergenic                        | opa1 | ACGTTGGAT<br>GACATAGGC<br>TAGGAAGCA<br>GAC | ACGTTGGAT<br>GACTTGAC<br>AAGTTTACA<br>GAG  | aTAGGAAGC<br>AGACTACGC<br>AA       |                             |
| 6 | 154348855 | rs7776341  | [OPRM1]                  | intronic                          | opa1 | ACGTTGGAT<br>GTGGGTCTT<br>ACTCAAGAC<br>CTG | ACGTTGGAT<br>GTGATTGAA<br>GAGCCCCAA<br>GTC | gatatGCCACA<br>GCCAGGGAA<br>T      |                             |
| 6 | 154408217 | rs563649   | [OPRM1]                  | 5' UTR<br>variant and<br>intronic | opa1 | ACGTTGGAT<br>GGTCTTTAGA<br>TCATGCAGG<br>TC | ACGTTGGAT<br>GATAAGAAG<br>AAGTTTCTCC<br>CC | ggggaATGCA<br>GGTCTATAAC<br>CAA    | 19103668,<br>26902643       |
| 7 | 1983679   | rs1554505  | [MAD1L1]                 | intronic                          | opa1 | ACGTTGGAT<br>GTGGATAAC<br>TAGAGGGTT<br>CGG | ACGTTGGAT<br>GAGCGACTT<br>TTATGTCCAC<br>GG | aGGCTAGTG<br>CAACCAC               | 29662059<br>and<br>29700475 |
| 7 | 12268918  | rs5011432  | [TMEM106B]               | intronic                          | opa1 | ACGTTGGAT<br>GGATTATAA                     | ACGTTGGAT<br>GCAGTCATA                     | ACAAAATCC<br>ATAGACACT<br>AAA      | 29662059                    |

|    |           |            |                                          |                   |      |                                             |                                            |                                      |                       |
|----|-----------|------------|------------------------------------------|-------------------|------|---------------------------------------------|--------------------------------------------|--------------------------------------|-----------------------|
|    |           |            |                                          |                   |      | CCGATGCTTA<br>C                             | CCAAAAGGT<br>AAC                           |                                      |                       |
| 10 | 106563924 | rs61867293 | [SORCS3]                                 | intronic          | opa1 | ACGTTGGAT<br>GGGGCTTTTC<br>AATTTCCACA<br>G  | ACGTTGGAT<br>GGAGATGCT<br>CATCTTCTGG<br>AC | ccctTCATCTT<br>CTGGACACTT<br>GTCA    | 29700475              |
| 11 | 31850105  | rs1806153  | PAX6--[RCN1<br>and<br>DKFZp686K1<br>684] | intronic          | opa1 | ACGTTGGAT<br>GGGCATACA<br>AACATTGCTT<br>TC  | ACGTTGGAT<br>GGACATTAA<br>CAGGGAGGT<br>ATC | tcccCATTCGT<br>TTCAACTCTG<br>TC      | 29700475              |
| 12 | 23947737  | rs4074723  | [SOX5]                                   | intronic          | opa1 | ACGTTGGAT<br>GACAGCTGA<br>TTACCTTAGG<br>AC  | ACGTTGGAT<br>GGATACTATT<br>TTAATGCCAG      | gggcATGCCA<br>GTACTATAAA<br>AATGAAAT | 29700475              |
| 12 | 84941679  | rs2125716  | ---[]---                                 | intergenic        | opa1 | ACGTTGGAT<br>GGTGAAATA<br>AACCCAACA<br>CAG  | ACGTTGGAT<br>GGCAGCCAC<br>CTGTAAGCTA<br>TC | ggggCACCTG<br>TAAGCTATCA<br>GGGAA    | 27479909              |
| 13 | 44327799  | rs4143229  | [ENOX1]---<br>CCDC122                    | intronic          | opa1 | ACGTTGGAT<br>GGAAAGACA<br>CGCTGTGGA<br>AAC  | ACGTTGGAT<br>GCAAATATC<br>TAGGCCAAA<br>GG  | ggacGGCATA<br>GAAATATAA<br>ATGCTGAG  | 29700475              |
| 13 | 53626031  | rs12552    | [OLFM4]                                  | 3' UTR<br>variant | opa1 | ACGTTGGAT<br>GGGAACTGA<br>TCTAAGATTA<br>G   | ACGTTGGAT<br>GGTCACTGC<br>CATCAGATTT<br>TC | AGTCTTAGA<br>GTCATGTAA<br>ATAAAAGT   | 29700475,<br>27479909 |
| 14 | 55306207  | rs10483639 | SAMD4A---[]-<br>GCH1                     | intergenic        | opa1 | ACGTTGGAT<br>GAAGGATCC<br>AGGAAAAGG<br>AGG  | ACGTTGGAT<br>GAATGCCTG<br>GGTGTGTGT<br>ATG | aTGGGTGTG<br>TGTATGTACA<br>ACTTC     | 17363416              |
| 14 | 55360389  | rs3783641  | SAMD4A--<br>[GCH1]--<br>WDHD1            | intronic          | opa1 | ACGTTGGAT<br>GACTACTGCA<br>GTCTACTCAA<br>CC | ACGTTGGAT<br>GTTCCATGCC<br>TGGGCATTCC      | TTACAGTCCT<br>CATATAGAA<br>ATCAC     | 17363416              |
| 14 | 55379241  | rs8007267  | GCH1-[]--<br>SOCS4                       | intergenic        | opa1 | ACGTTGGAT<br>GACAATAGG<br>AGCGTGTGT<br>TTG  | ACGTTGGAT<br>GAGGCACAA<br>TCAGAGAAC<br>CAG | GCGTGTGTTT<br>GAACAGTA               | 17363416              |

|    |          |            |                                    |                  |      |                                            |                                            |                                      |                                                                                                                                                                                                  |
|----|----------|------------|------------------------------------|------------------|------|--------------------------------------------|--------------------------------------------|--------------------------------------|--------------------------------------------------------------------------------------------------------------------------------------------------------------------------------------------------|
| 18 | 53101598 | rs12958048 | AK093940---<br>[TCF4]--<br>MIR4529 | intronic         | opa1 | ACGTTGGAT<br>GGCTGGCTG<br>CATGATAAA<br>ATC | ACGTTGGAT<br>GAAACACAT<br>TACCAGAAC<br>CAG | tggTATTGTG<br>ATATTGTTCA<br>AAACTTCA | 29700475                                                                                                                                                                                         |
| 20 | 43723877 | rs734784   | STK4--<br>[KCNS1]-<br>WFDC5        | I>V (Att>Gtt)    | opa1 | ACGTTGGAT<br>GAGAGGTTT<br>CTCGGGATG<br>TCT | ACGTTGGAT<br>GCCAAGAGT<br>TTGAGGACTT<br>GC | CCGACACCCC<br>ATCAA                  | 20724292                                                                                                                                                                                         |
| 22 | 19950202 | rs6269     | TXNRD2--<br>[COMT]-<br>ARVCF       | intronic         | opa1 | ACGTTGGAT<br>GTGACACGT<br>CAGGCAACT<br>GAG | ACGTTGGAT<br>GTTGCTTGG<br>AGTGCCACC<br>ATC | TCGCCCCCTT<br>GTGTT                  | 20570835,<br>22528689,<br>16848906,<br>19094200,<br>19193196,<br>20627703,<br>20842020,<br>21423693,                                                                                             |
| 22 | 19950485 | rs4633     | TXNRD2--<br>[COMT]-<br>ARVCF       | H>H<br>(caC>caT) | opa1 | ACGTTGGAT<br>GTCATGGGT<br>GACACCAAG<br>GAG | ACGTTGGAT<br>GAGTAGGTG<br>TCAATGGCCT<br>CC | cccccaAGCGC<br>ATCCTGAACC<br>A       | 15537663,<br>20570835,<br>22528689,<br>16848906,<br>19094200,<br>20627703,<br>21423693,<br>22253202],<br>22612913,                                                                               |
| 22 | 19951521 | rs4680     | TXNRD2--<br>[COMT]-<br>ARVCF       | V>M<br>(Gtg>Atg) | opa1 | ACGTTGGAT<br>GCCAGCGGA<br>TGGTGGATTT<br>C  | ACGTTGGAT<br>GTTTTCCAGG<br>TCTGACAAC<br>GG | cagGCACACC<br>TTGTCCTCA              | 16848906,<br>22612913,<br>12595695,<br>20570835,<br>21120493,<br>21130573,<br>22337560,<br>22528689,<br>16848906,<br>19094200,<br>20627703,<br>21423693,<br>22718527,<br>22722321],<br>25218601, |

|   |           |            |                                 |            |      |                                             |                                            |                                    |                       |
|---|-----------|------------|---------------------------------|------------|------|---------------------------------------------|--------------------------------------------|------------------------------------|-----------------------|
|   |           |            |                                 |            |      |                                             |                                            |                                    | 26489634,<br>23302985 |
| 1 | 8504421   | rs159963   | SLC45A1-<br>[RERE]              | intronic   | opa2 | ACGTTGGAT<br>GGGGAATGT<br>TTATCCAATG<br>CC  | ACGTTGGAT<br>GAAGTCCCTT<br>CCACCTATGA<br>G | TTACTTCCAA<br>GATACAATG<br>C       | 29700475              |
| 1 | 72813218  | rs1432639  | NEGR1---[]---<br>-              | intergenic | opa2 | ACGTTGGAT<br>GTCACCTAA<br>CTACTTGGTG<br>G   | ACGTTGGAT<br>GGGTCTAGA<br>TTACCTCAAG<br>TG | ACTTGGTGG<br>AGAGTAGA              | 29700475              |
| 1 | 80799329  | rs2389016  | ---[]---                        | intergenic | opa2 | ACGTTGGAT<br>GTCTCTGACC<br>TATGACATCT<br>C  | ACGTTGGAT<br>GAATATGAA<br>CATGGCAAG<br>CTG | CCCACAGCTT<br>TCTAGTAA             | 29700475              |
| 1 | 90796053  | rs4261101  | ---[]---                        | intergenic | opa2 | ACGTTGGAT<br>GGCAAATCA<br>ACTAATGTG<br>ATAC | ACGTTGGAT<br>GATCCAATGT<br>TTTTCAGCGT<br>C | tAAATGATCA<br>TATGGTTTT<br>GTC     | 29700475              |
| 1 | 177026733 | rs7548151  | MIR488--<br>[ASTN1]---<br>FAM5B | intronic   | opa2 | ACGTTGGAT<br>GTAAGTGCA<br>TTTCACTTCT<br>C   | ACGTTGGAT<br>GGCAGCTAT<br>TTGAGGCAT<br>CTG | ccTGCTATCT<br>TCTGGCTTTT           | 29662059              |
| 2 | 15398714  | rs10929355 | [NBAS]                          | intronic   | opa2 | ACGTTGGAT<br>GGTTCTCCTT<br>TTTGCCCTTT<br>G  | ACGTTGGAT<br>GAAGGACTT<br>CAAAGGGG<br>ACG  | gggtGGGAGT<br>AGGTCACAA<br>AGATC   | 29662059              |
| 3 | 8804621   | rs53576    | CAV3--<br>[OXTR]-<br>MIR548     | intronic   | opa2 | ACGTTGGAT<br>GTGGAAAGG<br>AAAGGTGTA<br>CGG  | ACGTTGGAT<br>GGTAGAATG<br>AGCTTCCCAG<br>CC | gggttTACGG<br>GACATGCCC<br>GAGG    | 26178189              |
| 3 | 158107180 | rs7430565  | [RSRC1]---<br>MLF1              | intronic   | opa2 | ACGTTGGAT<br>GGCATAGTA<br>TATTCAATTG<br>TGG | ACGTTGGAT<br>GAGTTGACA<br>ATATCTAGCT<br>G  | GCTGAATATT<br>TTGAAATTAG<br>GTTTTA | 29700475              |
| 4 | 69947648  | rs4587017  | UGT2B10---<br>[]--UGT2B7        | intergenic | opa2 | ACGTTGGAT<br>GTGTTTCCTT<br>TAGCCACTCT<br>G  | ACGTTGGAT<br>GTCAGAAAA<br>AGCTGGTGT<br>GAC | gctggGAGAT<br>GAAAGCTTT<br>GGTAGA  | 28256933              |

|    |           |            |                                      |                  |      |                                             |                                             |                                  |          |
|----|-----------|------------|--------------------------------------|------------------|------|---------------------------------------------|---------------------------------------------|----------------------------------|----------|
| 4  | 69964088  | rs7439366  | UGT2B10---<br>[UGT2B7]---<br>UGT2B11 | Y>H<br>(Tat>Cat) | opa2 | ACGTTGGAT<br>GGCTGACGT<br>ATGGCTTATT<br>CG  | ACGTTGGAT<br>GTGGAGTCC<br>TCCAACAAAA<br>TC  | ACATTTGGTA<br>AGAGTGGAT          | 28256933 |
| 4  | 69970937  | rs10028494 | UGT2B10---<br>[UGT2B7]---<br>UGT2B11 | intronic         | opa2 | ACGTTGGAT<br>GACTCCTCCC<br>AATGGAGGA<br>AG  | ACGTTGGAT<br>GATCTGAAG<br>TTGTTTCTGT<br>GC  | gacGGGAGTC<br>AAACAGAAG<br>G     | 28256933 |
| 5  | 164523472 | rs11135349 | ----[]----                           | intergenic       | opa2 | ACGTTGGAT<br>GGCATTTCAT<br>CTAAGTGTA<br>AGC | ACGTTGGAT<br>GCAACATCTT<br>TTACTTTGC        | ATTCCCAATC<br>TGCCCC             | 29700475 |
| 6  | 154349059 | rs1074287  | [OPRM1]---<br>IPCEF1                 | intronic         | opa2 | ACGTTGGAT<br>GAAGAGCCA<br>CGTTCTAGA<br>GTC  | ACGTTGGAT<br>GGGAAGGAC<br>TGCATTTTGT<br>GG  | CTATTGTA<br>GTGGCTGA             | 28300812 |
| 7  | 12250652  | rs3807865  | ----[]-<br>TMEM106B                  | intergenic       | opa2 | ACGTTGGAT<br>GACTAGCAC<br>CAGAGTTAA<br>GGG  | ACGTTGGAT<br>GGGCAAGGC<br>CGTAGTTTTT<br>GT  | TTGCTCGGTT<br>TCGTTT             | 29662059 |
| 7  | 109105611 | rs12666117 | ----[]----                           | intergenic       | opa2 | ACGTTGGAT<br>GAAATGCTA<br>TGCACATCA<br>GAC  | ACGTTGGAT<br>GGGACAGCC<br>AGTGTCTTCT<br>AC  | TCAAGTCATG<br>GCTAAATTCA<br>AATA | 29700475 |
| 9  | 2983774   | rs1354115  | MIR548---[]--<br>--                  | intergenic       | opa2 | ACGTTGGAT<br>GACAGCGTC<br>CAGAAAGAA<br>CAG  | ACGTTGGAT<br>GACTTTACAA<br>CTCTGGAGG<br>TC  | TCTGCAACAT<br>CTTCATTTT          | 29700475 |
| 9  | 11544964  | rs10959913 | ----[]----                           | intergenic       | opa2 | ACGTTGGAT<br>GGCACACGT<br>ATGTTTATTG<br>TGG | ACGTTGGAT<br>GCCAGTCTAT<br>CATTGATGAT<br>GC | gaACATTTGG<br>GTTGGTTCC          | 29700475 |
| 9  | 126682068 | rs7029033  | [DENND1A]--<br>-LHX2                 | intronic         | opa2 | ACGTTGGAT<br>GACACCTGT<br>AATCCCAGCT<br>AC  | ACGTTGGAT<br>GTGATGCAA<br>TCTCGGCAC<br>GCT  | gaCCAGGTT<br>AAGTGATTCT<br>C     | 29700475 |
| 10 | 106611089 | rs1021363  | [SORCS3]                             | intronic         | opa2 | ACGTTGGAT<br>GATAGGGAG                      | ACGTTGGAT<br>GGAGGGCCC                      | AAACTCATTT<br>CTCATTCTAT<br>TTTT | 29662059 |

|    |           |            |                         |            |      |                                            |                                            |                                      |          |
|----|-----------|------------|-------------------------|------------|------|--------------------------------------------|--------------------------------------------|--------------------------------------|----------|
|    |           |            |                         |            |      | CATCATGCAA<br>TC                           | AATATTTAGA<br>GC                           |                                      |          |
| 11 | 88747912  | rs10501696 | [GRM5]---<br>TYR        | intronic   | opa2 | ACGTTGGAT<br>GACTAGGGC<br>TGATTCATAG<br>GG | ACGTTGGAT<br>GATGTAAGC<br>AGCAAGCTA<br>TGG | AGCAGCAAG<br>CTATGGTTCT<br>AAA       | 29662059 |
| 12 | 118375736 | rs7973260  | [KSR2]---<br>RFC5       | intronic   | opa2 | ACGTTGGAT<br>GTGTGGTCT<br>ATCCCTTTGT<br>C  | ACGTTGGAT<br>GAAAGTGCT<br>GGGATTACA<br>GGG | GTGAGCCAC<br>TGTGCC                  | 27089181 |
| 14 | 42179732  | rs4904738  | SNORA31---<br>[LRFN5]   | intronic   | opa2 | ACGTTGGAT<br>GGAGTAACA<br>GCATAAGAT<br>AC  | ACGTTGGAT<br>GCCCTTTTC<br>AATCTAAAGT<br>AG | cTAAGATACT<br>GTTTTATGAA<br>GATAATAG | 29700475 |
| 14 | 64686207  | rs915057   | [SYNE2]---<br>ESR2      | intronic   | opa2 | ACGTTGGAT<br>GTGAACGCA<br>TTGCTATGCT<br>GG | ACGTTGGAT<br>GGAGTGACC<br>TCTACATACA<br>CC | cctaGCCTATG<br>CCACGAATA<br>CA       | 29700475 |
| 14 | 104017953 | rs10149470 | TRMT61A--[]-<br>-BAG5   | intergenic | opa2 | ACGTTGGAT<br>GTCTCACTCT<br>GATGAAGCT<br>CC | ACGTTGGAT<br>GAGGAGTTC<br>GTCTCTCCCC<br>AG | ctccAGACCG<br>TAGTGGTGA<br>ACACAC    | 29700475 |
| 15 | 37648402  | rs8025231  | ----[]----              | intergenic | opa2 | ACGTTGGAT<br>GAGGGCATC<br>TGAAAGAAG<br>CAC | ACGTTGGAT<br>GCACTCCTGT<br>AGTGTTTCCT<br>C | AGCACATAA<br>ATAACTATAG<br>TACAATATA | 29700475 |
| 15 | 88945628  | rs28541419 | NTRK3---[]---<br>MRPL46 | intergenic | opa2 | ACGTTGGAT<br>GAAGTGACA<br>GTTGACAGC<br>CCG | ACGTTGGAT<br>GGATGGCTT<br>CAGACTGCTT<br>TG | gacaGAGAGC<br>ACAGAAAGA<br>GA        | 29662059 |
| 18 | 36883737  | rs62099069 | [LINC00669]             | intronic   | opa2 | ACGTTGGAT<br>GCCTTGAGC<br>CAACTTCTTT<br>TC | ACGTTGGAT<br>GAGTCTCCTT<br>TGCAAGTTG<br>GG | ccccGTTTTAT<br>TTCATTTTCT<br>GTTGCTA | 29700475 |
| 18 | 50754883  | rs62100776 | [DCC]                   | intronic   | opa2 | ACGTTGGAT<br>GGGCATTTA<br>AAGAAAACG<br>TTG | ACGTTGGAT<br>GACCTTCCAA<br>ATTAAGAGA<br>GC | cGCATCTGGA<br>TTTTTTATTTT<br>TTATTT  | 27089181 |

|    |          |            |                             |                  |      |                                            |                                           |                     |          |
|----|----------|------------|-----------------------------|------------------|------|--------------------------------------------|-------------------------------------------|---------------------|----------|
| 20 | 43727405 | rs13043825 | STK4--<br>[KCNS1]-<br>WFDC5 | E>E<br>(gaG>gaA) | opa2 | ACGTTGGAT<br>GTCGTCGTA<br>GTCGTCGCA<br>CAG | ACGTTGGAT<br>GTGGCGCGC<br>TTCCCGGGC<br>AC | CGCGGCGTC<br>GGAGGA | 20724292 |
|----|----------|------------|-----------------------------|------------------|------|--------------------------------------------|-------------------------------------------|---------------------|----------|
