# Supplementary material for: Genetic associations of perinatal pain and depression
Source: PubMed Central journal article supplement — Mol Pain. 2019 Oct 15;15:1744806919882139. doi: 10.1177/1744806919882139 (PMC6796201; doi:10.1177/1744806919882139), 2019-10-15
Supplement: MPX882139_Supplemental_Material2.pdf [file MPX882139_Supplemental_Material2.pdf]

**Supplemental Table 2.** Cohort demographics and obstetric, labor and delivery characteristics for missing and non-missing variable "pain unpleasantness max"

|                                                                  | Missing<br>(n=86) | Non-missing<br>(n=87) | P-value |
|------------------------------------------------------------------|-------------------|-----------------------|---------|
| Race                                                             |                   |                       |         |
| American Indian                                                  | 1/79 [1.3]        | 0/87 [0]              | 0.067   |
| Asian                                                            | 8/79 [10.1]       | 4/ 87 [4.6]           |         |
| Black                                                            | 20/79 [25.3]      | 14/ 87 [16.1]         |         |
| White                                                            | 49/79 [62.0]      | 69/ 87 [79.3]         |         |
| Other                                                            | 1/79 [1.3]        | 0/87 [0]              |         |
| Ethnicity                                                        |                   |                       |         |
| Hispanic or Latino                                               | 1/79 [1.3]        | 3/87 [3.4]            | 0.62    |
| Non-Hispanic or Latino                                           | 78/79 [98.7]      | 84/87 [96.6]          |         |
| Gravidity                                                        |                   |                       |         |
| 1                                                                | 52/67 [77.6]      | 66/76 [86.8]          | 0.14    |
| 2                                                                | 9/67 [13.4]       | 7/76 [9.2]            |         |
| 3                                                                | 4/67 [6.0]        | 2/76 [2.6]            |         |
| 4                                                                | 2/67 [3.0]        | 1/76 [1.3]            |         |
| Parity (zero)                                                    | 67/67[100]        | 76/76 [100]           | -       |
| Body Mass Index (kg/m2)                                          | 32.2 (6.4)        | 31.7 (5.7)            | 0.62    |
| Estimated Gestational Age (Weeks)                                | 39.2 (1.4)        | 39.4 (1.2)            | 0.23    |
| Plan to use Labor Epidural Analgesia (Yes)                       | 48/78 [61.5]      | 64/87 [73.6]          | 0.13    |
| Prenatal History of Anxiety or Depression (Yes)                  | 31/78 [39.7]      | 25/86 [29.1]          | 0.19    |
| History of Mental Illness other than Anxiety or Depression (Yes) | 4/77 [5.2]        | 8/85 [9.4]            | 0.38    |
| Marital Status                                                   |                   |                       |         |
| Single                                                           | 21/77 [27.3]      | 22/85 [25.9]          | >0.99   |
| Married                                                          | 55/77 [71.4]      | 61/85 [71.8]          |         |
| Divorced                                                         | 1/77 [1.3]        | 2/85 [2.4]            |         |
| Education (years)                                                | 14.90 (2.04)      | 15.56 (1.8)           | 0.032   |
| Breastfeeding, postpartum day 1-2 (Yes)                          | 8/9 [88.9]        | 66/70 [94.2]          | 0.46    |
| Breastfeeding, 6 weeks postpartum (Yes)                          | 5/6 [83.3]        | 61/69 [88.4]          | 0.55    |
| Breastfeeding, 3 months postpartum (Yes)                         | 4/5 [80.0]        | 51/67 [76.1]          | >0.99   |
| Mode of delivery                                                 |                   |                       |         |
| Normal Spontaneous vaginal delivery                              | 33/49 [67.3]      | 60/75 [80.0]          | 0.11    |
| Assisted vaginal - vacuum                                        | 2/49 [4.1]        | 1/75 [1.3]            |         |
| Cesarean - nonreassuring fetus                                   | 3/49 [6.1]        | 4/75 [5.3]            |         |
| Cesarean - arrest of dilation/descent                            | 4/49 [8.2]        | 8/75 [10.7]           |         |
| Cesarean - other                                                 | 7/49 [14.3]       | 2/75 [2.7]            |         |
| Perineal lacerations                                             |                   |                       |         |
| None                                                             | 19/48 [39.6]      | 22/75 [29.3]          | 0.51    |
| First degree                                                     | 5/48 [10.4]       | 14/75 [18.7]          |         |
| Second degree                                                    | 22/48 [45.8]      | 37/75 [49.3]          |         |
| Third degree                                                     | 2/48 [4.2]        | 1/75 [1.3]            |         |
| Fourth degree                                                    | 0/75 [0]          | 1/75 [1.3]            |         |
| Duration of labor (hours)                                        | 12.33 (8.30)      | 17.57 (8.08)          | 0.002   |

|                                                       |             |              |      |
|-------------------------------------------------------|-------------|--------------|------|
| Number of supplemental labor epidural analgesia doses | 0.295 (1.0) | 0.367 (0.80) | 0.70 |
|-------------------------------------------------------|-------------|--------------|------|

*Data are reported as frequency [%] or mean (standard deviation)*
